# Supplementary material for: Characterization and Trend of Co-Infection with Neisseria gonorrhoeae and Chlamydia trachomatis from the Korean National Infectious Diseases Surveillance Database
Source: PubMed Central journal article supplement — World J Mens Health. 2019 Dec 27;39(1):107–15. doi: 10.5534/wjmh.190116 (PMC7752515; doi:10.5534/wjmh.190116), 2019-12-27
Supplement: wjmh-39-107-s001.pdf [file wjmh-39-107-s001.pdf]

| 성병 표본감시 신고서                                                                                          |           |                            |                                                                                                                                                                                                                                                                                                              |                                                              |
|------------------------------------------------------------------------------------------------------|-----------|----------------------------|--------------------------------------------------------------------------------------------------------------------------------------------------------------------------------------------------------------------------------------------------------------------------------------------------------------|--------------------------------------------------------------|
| 수 신 : 보건소장                                                                                           |           |                            |                                                                                                                                                                                                                                                                                                              |                                                              |
| 표본감시기간 : 년 월 일 ~ 년 월 일                                                                               |           |                            |                                                                                                                                                                                                                                                                                                              |                                                              |
| 성 별                                                                                                  | 연령<br>(만) | 진단일                        | 질 환 명                                                                                                                                                                                                                                                                                                        | 환자<br>구분                                                     |
| <input type="checkbox"/> 남 <input type="checkbox"/> 여                                                |           |                            | <input type="checkbox"/> 매독 <input type="checkbox"/> 임질 <input type="checkbox"/> 클라미디아감염증<br><input type="checkbox"/> 성기단순포진(초발) <input type="checkbox"/> 성기단순포진(재발) <input type="checkbox"/> 연성하감<br><input type="checkbox"/> 침규곤달름(초발) <input type="checkbox"/> 침규곤달름(재발) <input type="checkbox"/> 비임균성요도염 | <input type="checkbox"/> 환자<br><input type="checkbox"/> 의사환자 |
| <input type="checkbox"/> 남 <input type="checkbox"/> 여                                                |           |                            | <input type="checkbox"/> 매독 <input type="checkbox"/> 임질 <input type="checkbox"/> 클라미디아감염증<br><input type="checkbox"/> 성기단순포진(초발) <input type="checkbox"/> 성기단순포진(재발) <input type="checkbox"/> 연성하감<br><input type="checkbox"/> 침규곤달름(초발) <input type="checkbox"/> 침규곤달름(재발) <input type="checkbox"/> 비임균성요도염 | <input type="checkbox"/> 환자<br><input type="checkbox"/> 의사환자 |
| <input type="checkbox"/> 남 <input type="checkbox"/> 여                                                |           |                            | <input type="checkbox"/> 매독 <input type="checkbox"/> 임질 <input type="checkbox"/> 클라미디아감염증<br><input type="checkbox"/> 성기단순포진(초발) <input type="checkbox"/> 성기단순포진(재발) <input type="checkbox"/> 연성하감<br><input type="checkbox"/> 침규곤달름(초발) <input type="checkbox"/> 침규곤달름(재발) <input type="checkbox"/> 비임균성요도염 | <input type="checkbox"/> 환자<br><input type="checkbox"/> 의사환자 |
| <input type="checkbox"/> 남 <input type="checkbox"/> 여                                                |           |                            | <input type="checkbox"/> 매독 <input type="checkbox"/> 임질 <input type="checkbox"/> 클라미디아감염증<br><input type="checkbox"/> 성기단순포진(초발) <input type="checkbox"/> 성기단순포진(재발) <input type="checkbox"/> 연성하감<br><input type="checkbox"/> 침규곤달름(초발) <input type="checkbox"/> 침규곤달름(재발) <input type="checkbox"/> 비임균성요도염 | <input type="checkbox"/> 환자<br><input type="checkbox"/> 의사환자 |
| <input type="checkbox"/> 남 <input type="checkbox"/> 여                                                |           |                            | <input type="checkbox"/> 매독 <input type="checkbox"/> 임질 <input type="checkbox"/> 클라미디아감염증<br><input type="checkbox"/> 성기단순포진(초발) <input type="checkbox"/> 성기단순포진(재발) <input type="checkbox"/> 연성하감<br><input type="checkbox"/> 침규곤달름(초발) <input type="checkbox"/> 침규곤달름(재발) <input type="checkbox"/> 비임균성요도염 | <input type="checkbox"/> 환자<br><input type="checkbox"/> 의사환자 |
| 신고일 :      년      월      일                                                                           |           |                            |                                                                                                                                                                                                                                                                                                              |                                                              |
| 의료기관명 :                                                                                              |           | 요양기관지정번호 :                 |                                                                                                                                                                                                                                                                                                              |                                                              |
| 주 소 :                                                                                                |           | 전화번호(      -      -      ) |                                                                                                                                                                                                                                                                                                              |                                                              |
| 진단 의사 성명 :                                                                                           |           | (서명 또는 날인)                 |                                                                                                                                                                                                                                                                                                              |                                                              |
| 면 허 번 호 :                                                                                            |           | 전 문 과 목 :                  |                                                                                                                                                                                                                                                                                                              |                                                              |
| 작성 요령    ① 동일인이 여러 질병에 동시에 감염된 경우 개별칸에 작성한 후(표시로 묶습니다).<br>② 비임균성요도염은 보건소에서만 신고하고 의료기관에서는 신고하지 않습니다. |           |                            |                                                                                                                                                                                                                                                                                                              |                                                              |

**Supplement 1.** Official report form for sexually transmitted diseases from the Korean National Infectious Diseases Surveillance of the Korea Centers for Disease Control and Prevention.
