# Supplementary material for: Characterization and Trend of Co-Infection with Neisseria gonorrhoeae and Chlamydia trachomatis from the Korean National Infectious Diseases Surveillance Database
Source: PubMed Central journal article supplement — World J Mens Health. 2019 Dec 27;39(1):107–15. doi: 10.5534/wjmh.190116 (PMC7752515; doi:10.5534/wjmh.190116), 2019-12-27
Supplement: wjmh-39-107-s002.pdf [file wjmh-39-107-s002.pdf]

**Supplement 2.** Multiple overlapping in age and sex parameters in the same diagnostic day of *Neisseria gonorrhoeae* (NG) and *Chlamydia trachomatis* (CT) infections

| Category                     | Speciality | Sex    | Age | Diseases    | DX. date |
|------------------------------|------------|--------|-----|-------------|----------|
| Primary clinicA              | Urology    | Male   | 27  |             | 20150311 |
|                              |            | Male   | 27  |             | 20150311 |
|                              |            | Male   | 27  | NG: 3 cases | 20150311 |
|                              |            | Male   | 27  | CT: 2 cases | 20150311 |
|                              |            | Male   | 27  |             | 20150311 |
| Regional health care centerA | Unknown    | Female | 29  |             | 20110802 |
|                              |            | Female | 29  | NG: 4 cases | 20110802 |
|                              |            | Female | 29  | CT: 1 case  | 20110802 |
|                              |            | Female | 29  |             | 20110802 |
| Primary clinicB              | Urology    | Male   | 33  | NG: 1 case  | 20150511 |
|                              |            | Male   | 33  | CT: 2 cases | 20150511 |
| Primary clinicC              | OB &GY     | Female | 23  |             | 20151021 |
|                              |            | Female | 23  | NG: 2 cases | 20151021 |
|                              |            | Female | 23  | CT:2 cases  | 20151021 |
|                              |            | Female | 23  |             | 20151021 |
| Regional health care centerB | Unknown    | Male   | 24  | NG: 3 cases | 20150112 |
|                              |            | Male   | 24  | CT: 1 case  | 20150112 |
|                              |            | Male   | 24  |             | 20150112 |
| Primary clinicD              | OB &GY     | Female | 30  | NG: 1 case  | 20141201 |
|                              |            | Female | 30  | CT: 2 cases | 20141201 |
| Regional health care centerC | Unknown    | Female | 21  | NG: 1 case  | 20131101 |
|                              |            | Female | 21  | CT: 2 cases | 20131101 |
| Regional health care centerD | Unknown    | Female | 29  | NG: 1 case  | 20111123 |
|                              |            | Female | 29  | CT: 2 cases | 20111123 |
| Primary clinicE              | OB &GY     | Female | 24  | NG: 2 cases | 20141028 |
|                              |            | Female | 24  | CT: 2 cases | 20141028 |
| Regional health care centerE | Unknown    | Female | 31  | NG: 1 case  | 20141125 |
|                              |            | Female | 31  | CT: 2 cases | 20141125 |
| Regional health care centerE | Unknown    | Female | 40  | NG: 1 case  | 20150625 |
|                              |            | Female | 40  | CT: 2 cases | 20150625 |
