# Supplementary material for: Characterization and Trend of Co-Infection with Neisseria gonorrhoeae and Chlamydia trachomatis from the Korean National Infectious Diseases Surveillance Database
Source: PubMed Central journal article supplement — World J Mens Health. 2019 Dec 27;39(1):107–15. doi: 10.5534/wjmh.190116 (PMC7752515; doi:10.5534/wjmh.190116), 2019-12-27
Supplement: wjmh-39-107-s003.pdf [file wjmh-39-107-s003.pdf]

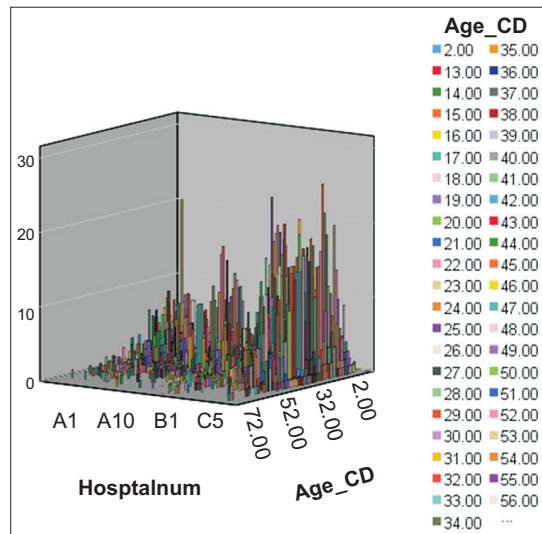

**Supplement 3.** Numbers of reported gonococcal infected case (X axis: Hospital code. Y axis: Age code. Z axis: numbers of reported case) between 2011 to 2015.
